# Supplementary material
Source: PubMed Central journal article supplement (PMC4326742)
Supplement: supp_pp.114.247940_247940suppfigs.pdf [file supp_pp.114.247940_247940suppfigs.pdf]

### GA up-regulated genes

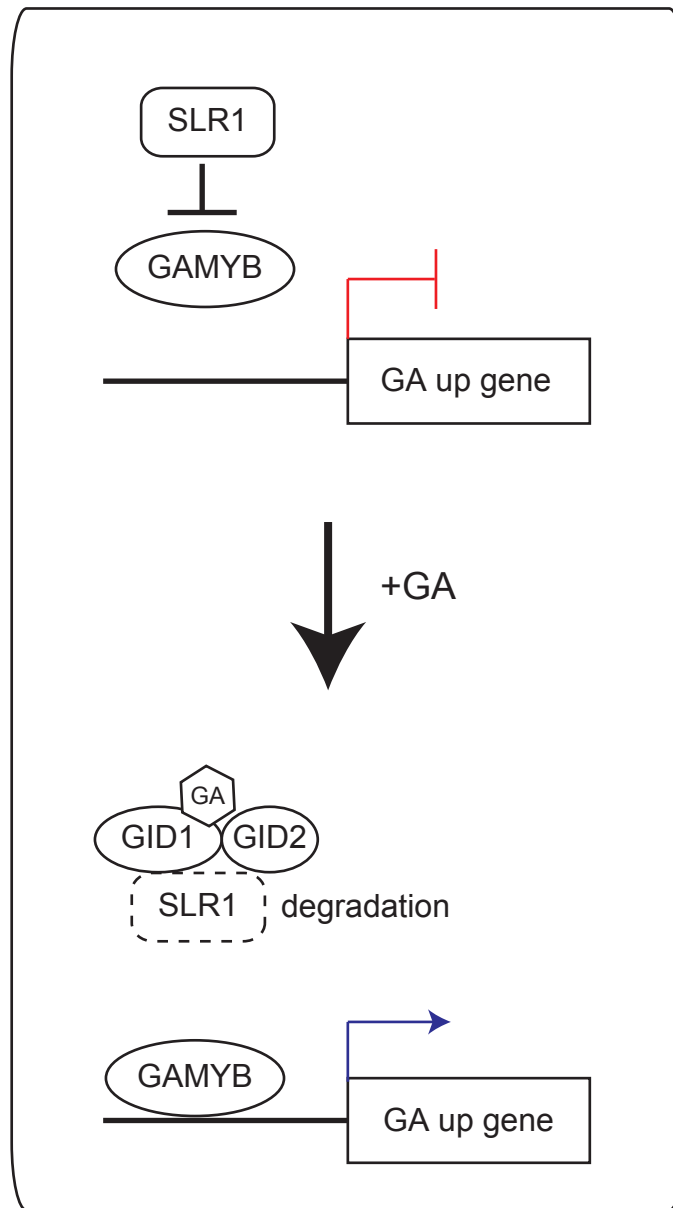

**Supplemental Figure S1.** Simplified model of GA-regulated gene expression in rice aleurone cells.

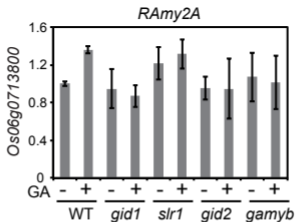

**Supplemental Figure S2. qRT-PCR analysis of *RAmy2A* in embryoless half-seeds of *gid1*, *slr1*, *gid2*, and *gamyb*.**

Experimental conditions are described in Fig. 1. The data presented are means  $\pm$  SD of four replicates.

## GA up-regulated genes

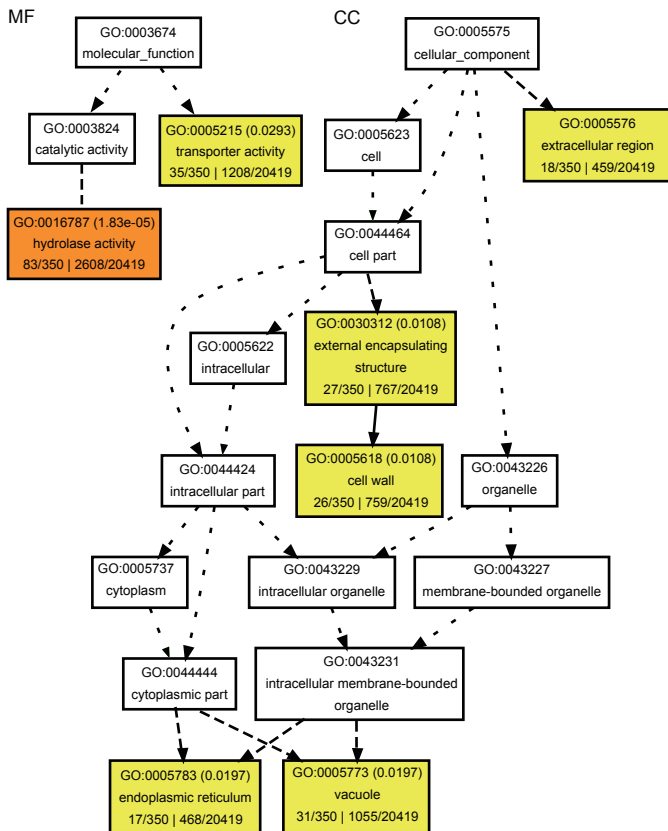

## GA down-regulated genes

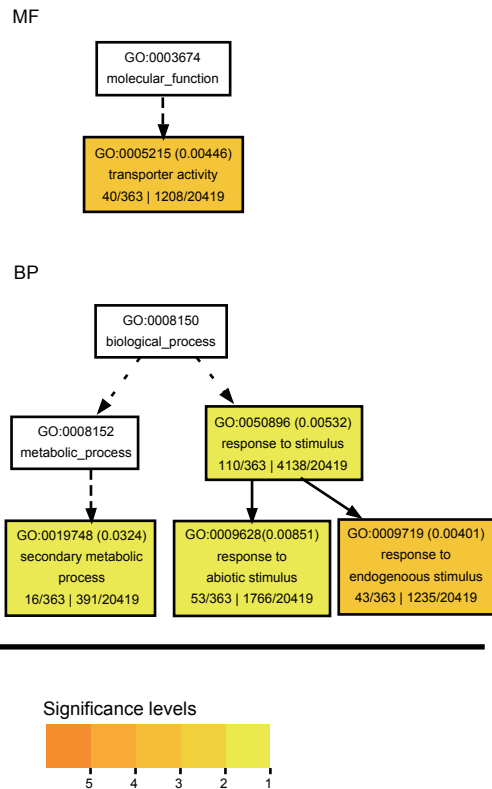

**Supplemental Figure S3. Gene Ontology analysis of GA-regulated genes.** GO analysis by agriGO (<http://bioinfo.cau.edu.cn/agriGO/index.php>) with respect to MF, CC, and biological process (BP) for GA up- or down-regulated genes. The enrichment level of the term is indicated by the color intensity of boxes. Solid, dashed, and dotted lines represent two-, one- and zero- enriched terms between connected boxes, respectively.

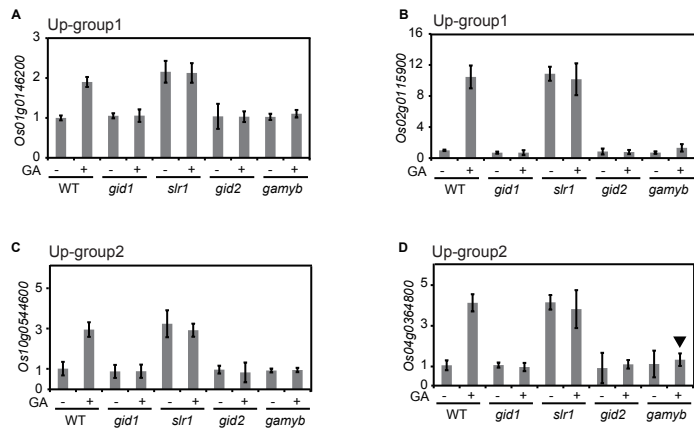

**Supplemental Figure S4. Expression analysis of two representative genes in Up-group1 (A) and (B), and Up-group2 (C) and (D) by RT-PCR.** The arrowheads in panel (D) show no GA-mediated changes in the expression of *Os04g0364800* by GA, although the corresponding array data indicated significant down-regulation (arrowhead in Fig. 6B). The data presented are means  $\pm$  SD of four replicates.

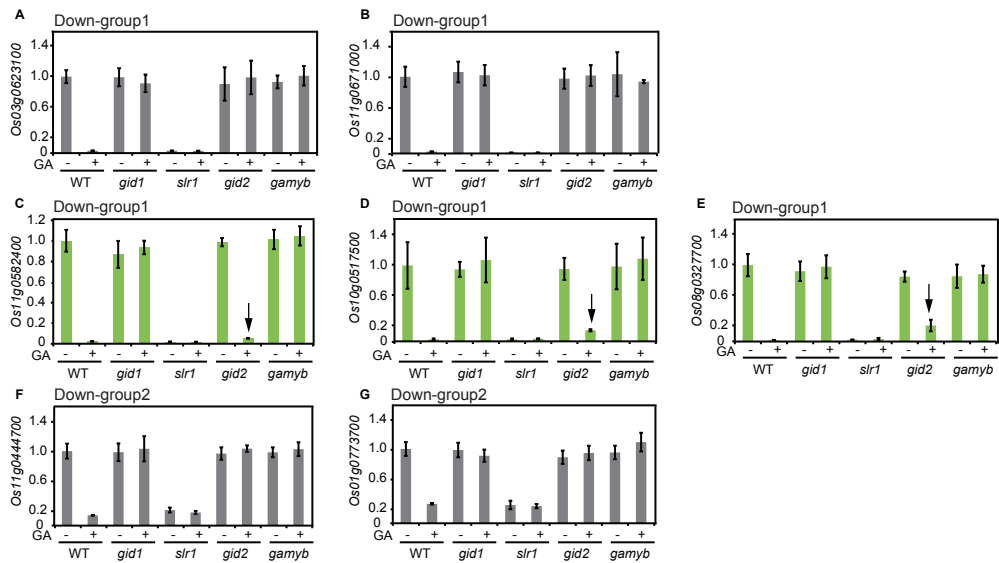

**Supplemental Figure S5. Expression analysis of two representative genes in Down-group1 (A) and (B), and Down-group2 (F) and (G) by qRT-PCR.** The expression of three genes having obvious downward outliers in *gid2* (green lines in Fig. 6C) was also analyzed (arrows in panels C-E). The data presented are means  $\pm$  SD of four replicates.

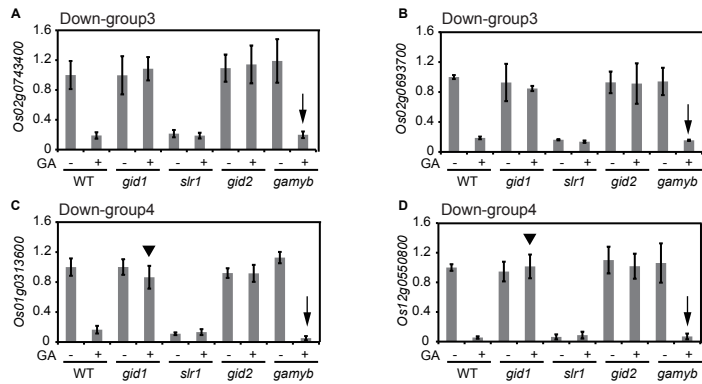

**Supplemental Figure S6. Expression analysis of two representative genes in Down-group3 (A) and (B), and Down-group4 (C) and (D) by RT-PCR.** The down-regulation of genes in *gamyb* is indicated by arrows. Although array data showed downward outliers in Down-group4 in *gid1* (Fig. 6F), down-regulation in *gid1* was not detected by qRT-PCR (arrowheads in panels C and D). The data presented are means  $\pm$  SD of four replicates.

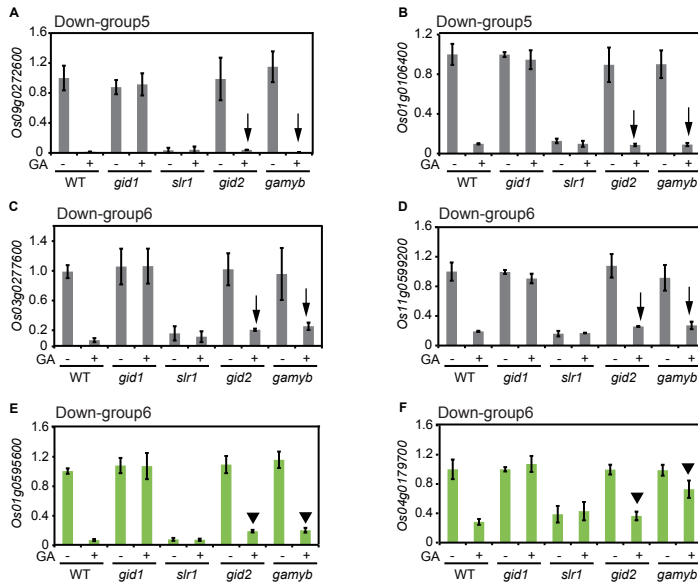

**Supplemental Figure S7. Expression analysis of two representative genes in Down-group5 (A) and (B) and Down-group6 (C) and (D) by qRT-PCR.**

Down-regulation of genes in *gid2* and *gamyb* are indicated by arrows. The expression of genes not fully down-regulated in *gid2* or *gamyb* (green lines in Fig. 6H) is indicated by arrowheads in panels (E) and (F). The data presented are means  $\pm$  SD of four replicates.

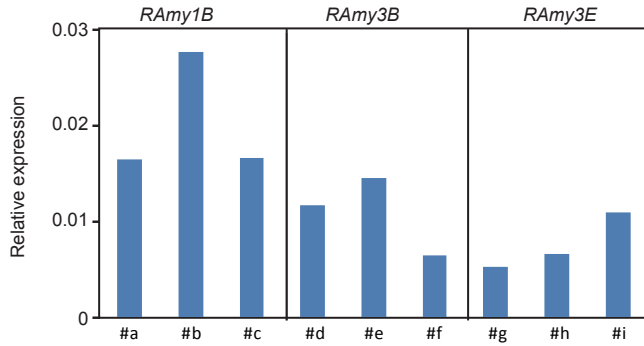

**Supplemental Figure S8.** Expression analysis of endogenous *RAmy1B*, *3B*, and *3E* in comparison to endogenous *Ubi* expression in embryoless half-seeds in the absence of GA by qRT-PCR.
